# Supplementary material for: TGF-β-SNAIL axis induces Müller glial-mesenchymal transition in the pathogenesis of idiopathic epiretinal membrane
Source: PubMed Central journal article supplement (PMC6346093; doi:10.1038/s41598-018-36917-9), 2019-01-24
Supplement: 41598_2018_36917_MOESM1_ESM.pdf [file 41598_2018_36917_MOESM1_ESM.pdf]

# TGF- $\beta$ -SNAIL axis induces Müller glial-mesenchymal transition in the pathogenesis of idiopathic epiretinal membrane

Atsuhiko Kanda, Kousuke Noda, Ikuyo Hirose, Susumu Ishida

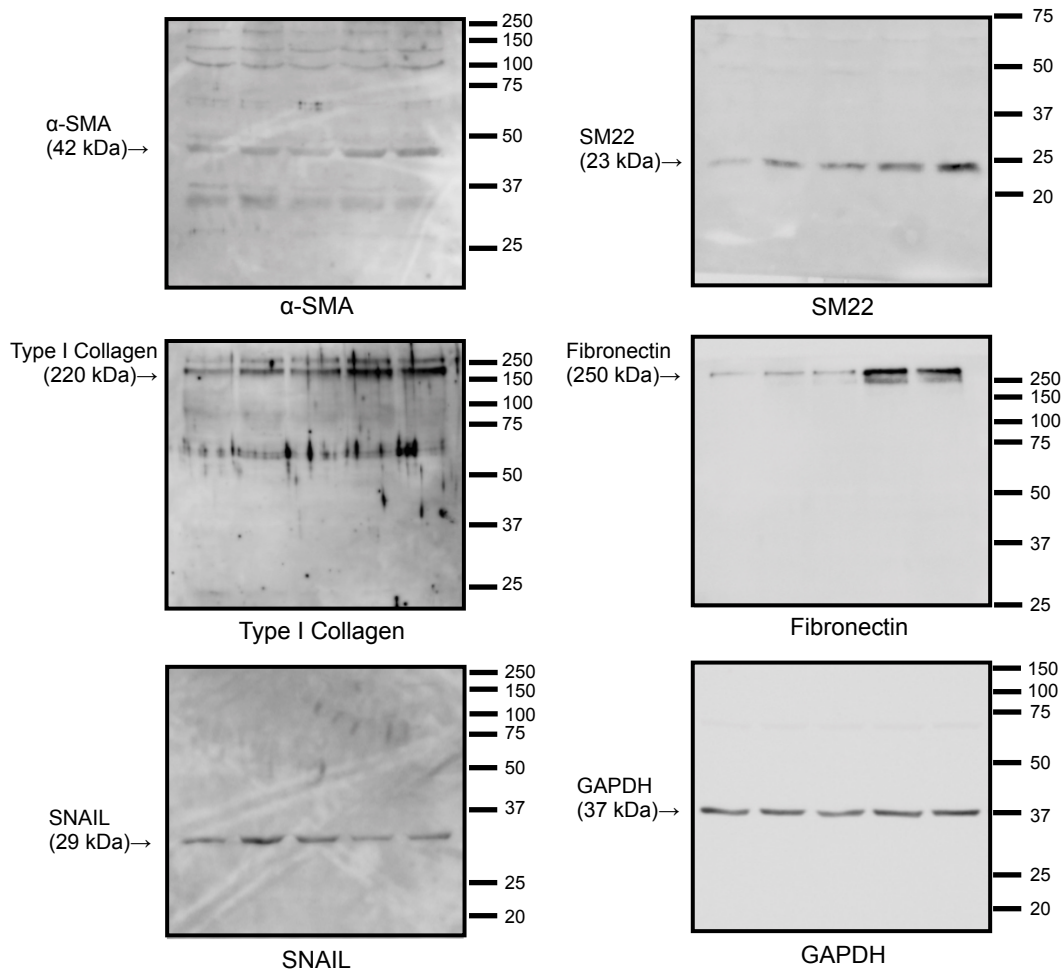

**Supplementary Figure S1.** The full length blots of Fig. 2J.

# TGF- $\beta$ -SNAIL axis induces Müller glial-mesenchymal transition in the pathogenesis of idiopathic epiretinal membrane

Atsuhiko Kanda, Kousuke Noda, Ikuyo Hirose, Susumu Ishida

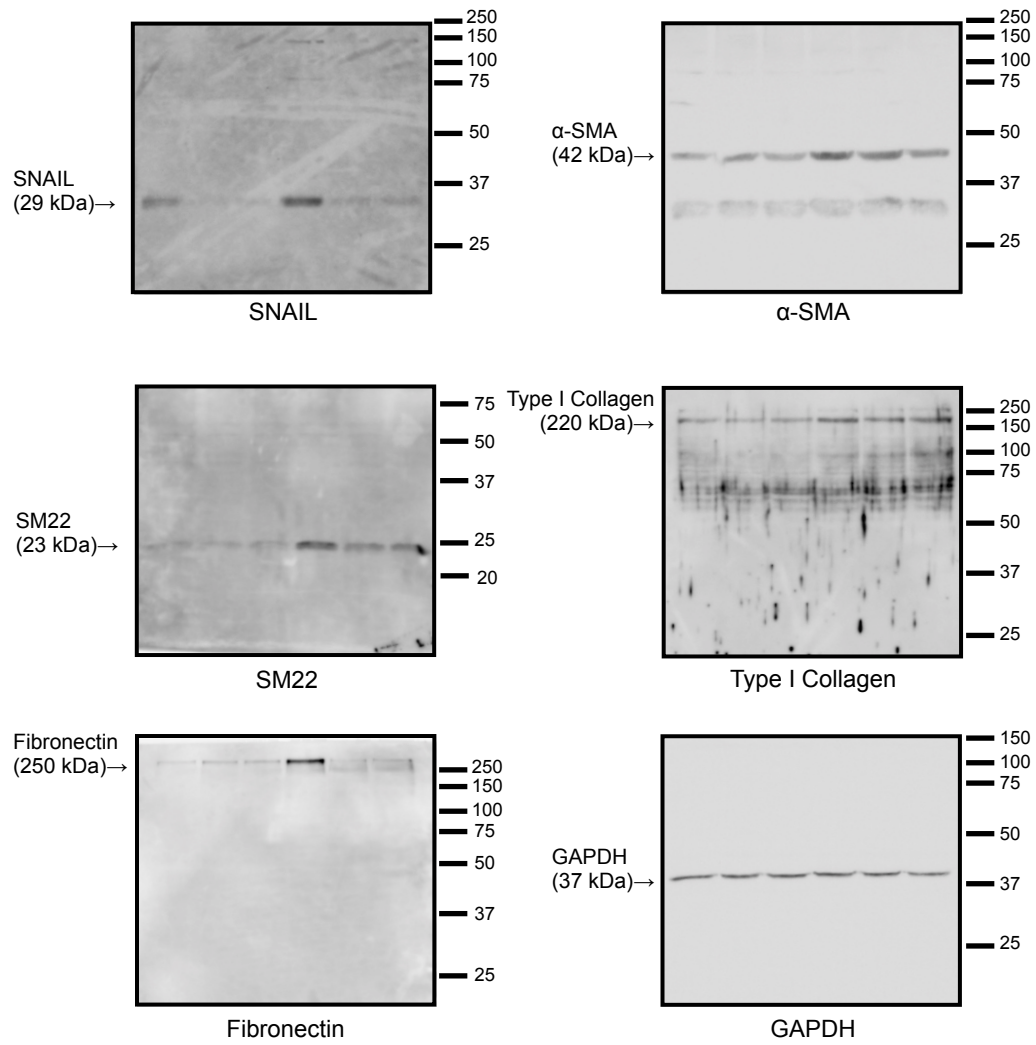

**Supplementary Figure S2.** The full length blots of Fig. 3F.

**TGF- $\beta$ -SNAIL axis induces Müller glial-mesenchymal transition in the pathogenesis of idiopathic epiretinal membrane**

Atsuhiko Kanda, Kousuke Noda, Ikuyo Hirose, Susumu Ishida

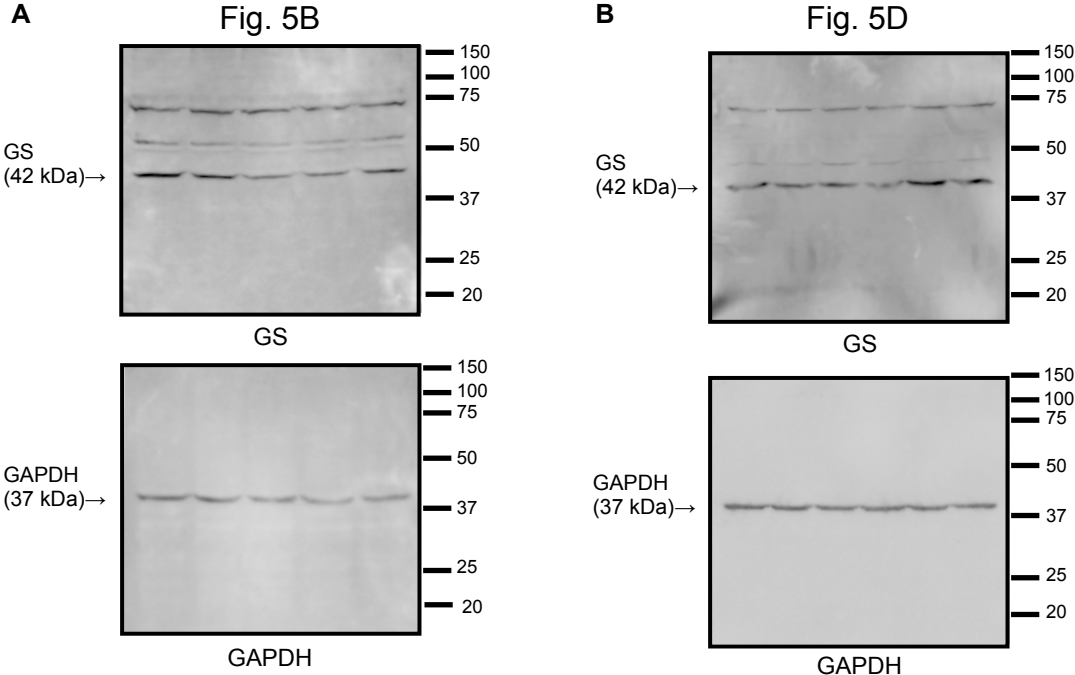

**Supplementary Figure S3.** The full length blots of Fig. 5B and D.

# TGF- $\beta$ -SNAIL axis induces Müller glial-mesenchymal transition in the pathogenesis of idiopathic epiretinal membrane

Atsuhiko Kanda, Kousuke Noda, Ikuyo Hirose, Susumu Ishida

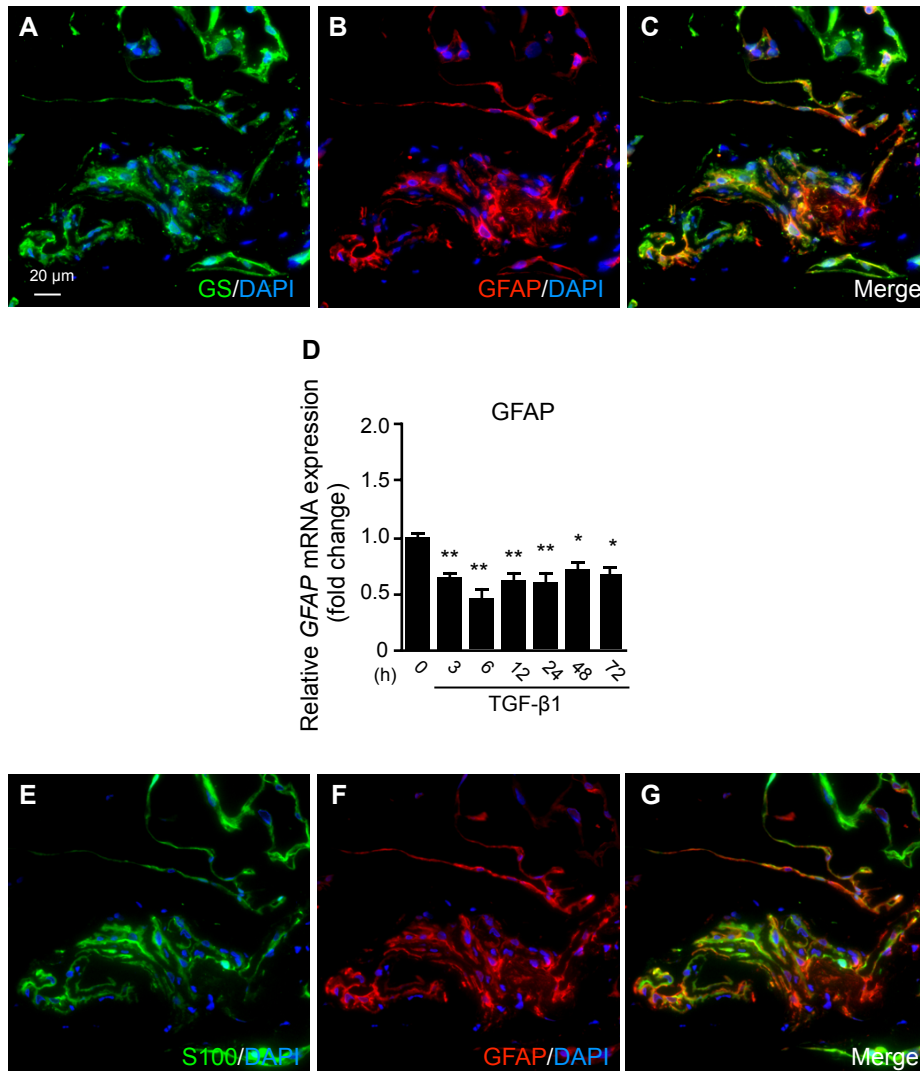

**Supplementary Figure S4.** Localization and expression analyses of GFAP in iERM patient specimens and Müller glial cells. (A-C) Double labeling of GS (green) and GFAP (red) in the iERM tissue specimens with DAPI (blue) counterstain to nuclei. Scale bar = 20  $\mu$ m. (D) Real-time quantitative PCR analyses for the time course of expression levels of *GFAP*. h, hours. n = 6 per group, \* $p$  < 0.05, \*\* $p$  < 0.01. (E-G) Double labeling of S100 (green) and GFAP (red) in the iERM tissue specimens with DAPI (blue) counterstain to nuclei.
